# Supplementary material for: Functional characterization of a “plant-like” HYL1 homolog in the cnidarian Nematostella vectensis indicates a conserved involvement in microRNA biogenesis
Source: bioRxiv preprint, doi:10.1101/2020.05.31.126003, version 3 (2022-03-06)
Supplement: Supplementary File 1 [file 126003_file02.xlsx]

## Sheet: Clonning
Supplementary file1
The MO clones that are showing the intron retention (lower case- intron, upper case-exon )
Hyl1La SI MO1_Clone_1
CCNNNNNNNNANTTCCNNNGNTCGGTTTTTCNCAAGATAGTGATCCTGAGCTGCTGAATGACATTATCATAAAGAAAAAATACAAAACAAAGGAGAAAAAAATTGCTGAATGTACACAGACAAATTCACCTGCAAATACCCTTCAGCTAAGGACTCTTGATCCAGATGAGCTTTTATTCCAAACGCTGCTACCAGTGATTACAAAAAGgtacaagtctgtttcttttatcttataaaaagatatcttgttaattgtactaataaatatatatgtgattcaatatgtttttttaaggaagaagagtatttgtacctctatcaaggcacaaagttttttttattgatccctaactagacccaaatttgctctgtggttcatcaaaacatggtattcataga…
Hyl1La SI MO1_Clone_2
CCTNNNNNNNTGTAGGNNANNTCTANNNNANAGTGATCCTGANCTGCTGAATGACATTATCATAAAGAAAAAATACAAAACAAAGGAGAAAAAAATTGCTGAATGTACACAGACAAATTCACCTGCAAATACCCTTCAGCTAAGGACTCTTGATCCAGATGAGCTTTTATTCCAAACGCTGCTACCAGTGATTACAAAAAGgtacaagtctgtttcttttatcttataaaaagatatcttgttaattgtactaataaatatatatgtgattcaatatgtttttttaaggaagaagagtatttgtacctctatcaaggcacaaagtttttttttattgatccctaactagacccaaatttgctctgtggttcatcaaaacatggtattcatagaacatta…
Hyl1La SI MO2_Clone_1
NNNNNNGNNANNNNNNNNGGNTCGGTTTTTCNCAAGATATGATAACACAGGCAGCCCATGGGAAGTTGCTGGAGCTTTGGAAGGGGCAAACTTTTGTACTGAAGATGAAGTTTGGAATGATGAGAGTCAGCAGAAGAGAGGAGTAAAAAGAAGACACTCAGAAACAAACTACACTAGCTTCTATGgtaaggcttagactacaacaaggcaggggggaaaggggagagcaatcacgaatcacatttccttatttttaaatatgagttagaaaaatatgttttcacaaaccacagaaaaaatttggaaaatggctgtgaacttagaaaaaagaatgcaagatcaacaaatagccatagatactaattacactcacaatgcattgccatcacaaaatggtgc…
> Hyl1La SI MO2_Clone_2
NNTNNNNNTNNNCCNAANNNNNNNTNANCNAANNNNNGANNNNTTNNTCNNNNNNTTNTTAGANNNNANAANNNNNNNTNNNNGAAAAATTGNCCCAATTNAGNAGCATNCACGCNGNGAGTNANNTTNTAANCCNTTNNTTNAANNNGTAATTATCTCTAATNCTTAACTACNNNGANGAGTTTTCCGGTNNTNATCTCNNNTTTTTTAAACTTGGAAGCAGGGTTCCCATTCAATTGTTTTTTTTCATCNTAGTGAATAAANTCAAACTGCTTTAANNACTTGTGCCTGAACACCATATCCATCCGGCGTAATACGACTCACTATAGGGAGAGCGGCCGCCAGATCTTCCGGATGGCTCGAGTTTTTCAGCAAGATATGATAACACAGNCAGCCCAT…
